# Supplementary material
Source: PubMed Central journal article supplement (PMC2823456)
Supplement: supp_M109.058313_jbc.M109.058313-1.pdf [file supp_M109.058313_jbc.M109.058313-1.pdf]

Figure S1  
Shi et al.

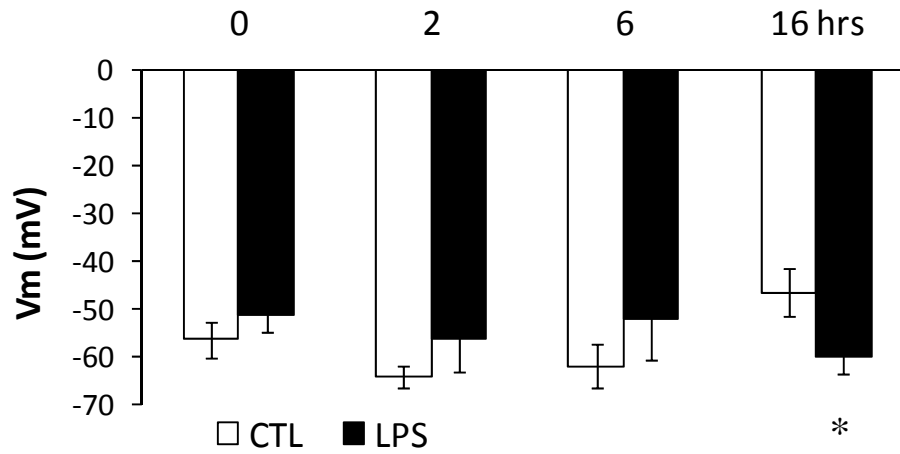

**Figure S1.** The effect of LPS on membrane potentials (Vm) was studied in vascular smooth muscle cells (SMCs) freshly dissociated from the mouse aorta by parallel comparison of the Vm recorded from cells treated with and without LPS. Although there were no statistically significant changes in Vm with an LPS treatment for 0, 2 and 6 h, significant hyperpolarization occurred with a 16 h exposure (\*,  $P < 0.05$ ;  $n = 10$ ).

Figure S2  
Shi et al.

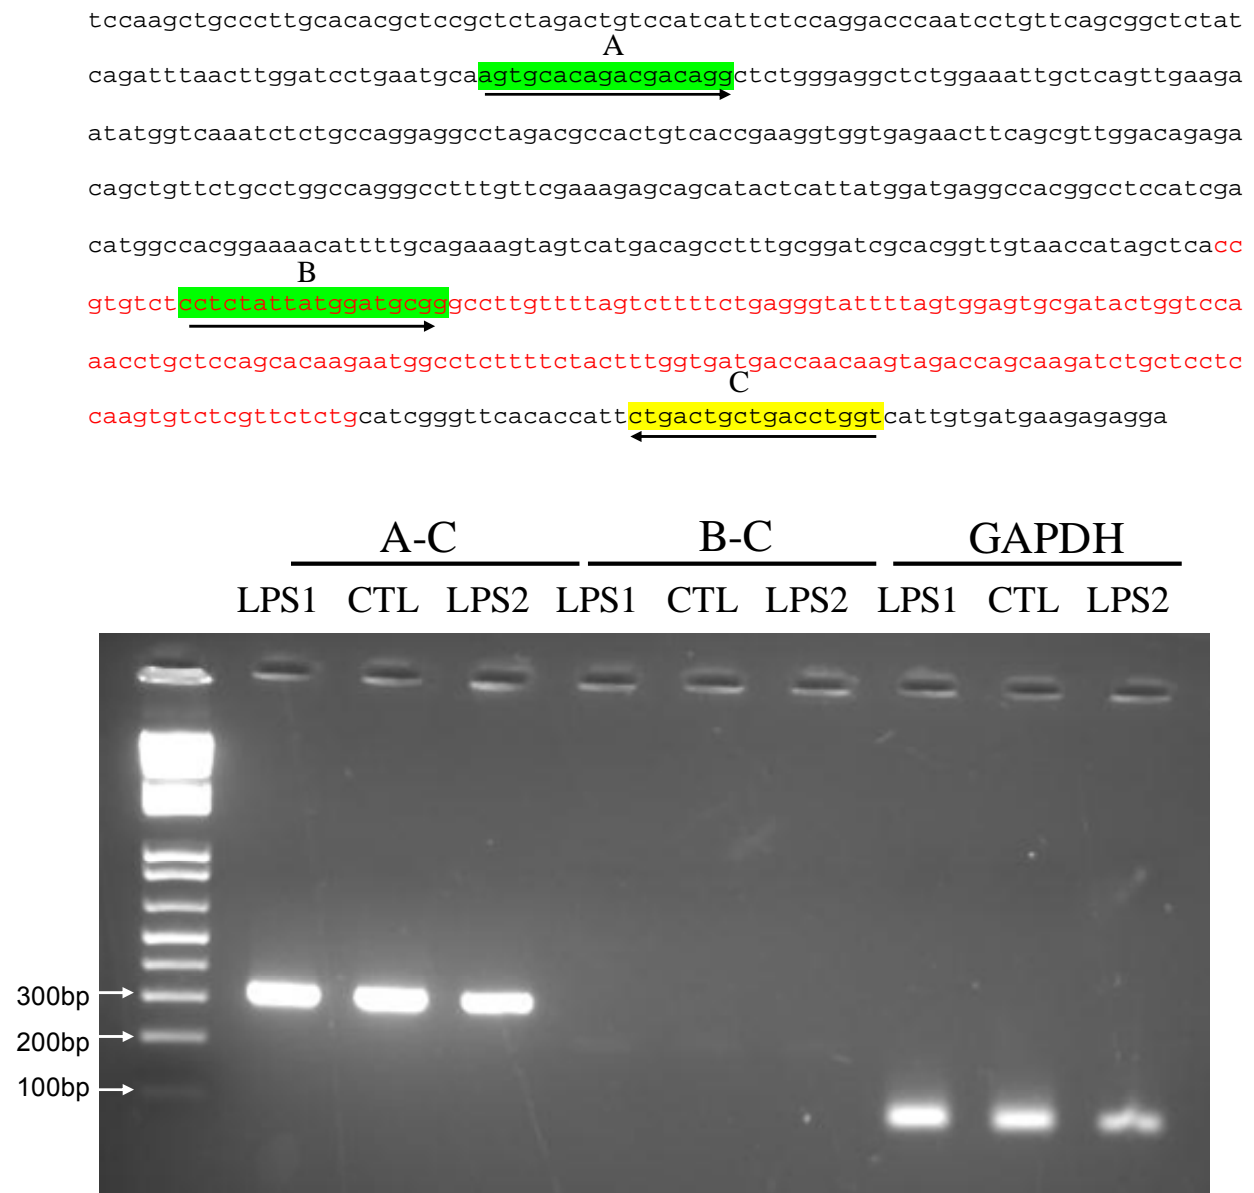

**Figure S2.** Detection of SUR2A and SUR2B mRNAs in rat vascular smooth myocytes. Three plates of A10 cells were treated with (1µg/ml, 20 h; LPS1, LPS2) and sham (CTL). RT-PCR was performed on the RNAs extracted from these A10 cells using primers indicated in the upper panel in which a partial sequence of SUR2 cDNA is shown with a 174bp insertion for SUR2A (red). The expected PCR fragment is ~490bp for SUR2A and ~310bp for SUR2B using primers A and C. The presence of SUR2A mRNA was further examined with primers B and C. Although a 200bp band appears it is extremely weak. Because of this, whether the SUR2A is up-regulated following the LPS treatment cannot be resolved.
